# Supplementary material for: Human breast milk-derived phospholipid DOPE ameliorates intestinal injury associated with NEC by inhibiting ferroptosis
Source: Royal Society of Chemistry journal article supplement (doi:10.1039/d4fo03904a), 2024-01-01
Supplement: d4fo03904a2.xlsx [file d4fo03904a2.xlsx]

## Sheet: Sheet1
Name	Preterm	Term	VIP	Fold change	P-value
PC(18:1/14:0)	0.00400879	0.00400792	0.0431051	1.00022	0.99892
PC(P-18:0/18:2)	1.16087e-05	1.15655e-05	1.01814	1.00374	0.996011
Sphingosine(16:1)	0.00183361	0.00185807	0.401337	0.986834	0.986003
TG(18:2/18:2/20:4)	1.02445e-06	1.01005e-06	0.335662	1.01426	0.984094
HexCer(d18:1/16:0)	0.00030592	0.000314849	1.01002	0.971642	0.974458
HexCer(d18:1/18:1)	6.68661e-05	6.86597e-05	0.535933	0.973877	0.971655
TG(16:0/16:0/16:1)	1.54534e-05	1.52242e-05	0.097019	1.01506	0.970463
HexCer(d18:0/20:0)	4.92233e-05	4.7661e-05	0.430203	1.03278	0.964866
SM(d17:1/26:1)	0.000258727	0.000263859	0.202722	0.980551	0.954804
Cer(t16:0/26:0)	0.000280987	0.000271915	1.06146	1.03336	0.953807
Cer(d18:0/16:0)	8.74574e-05	9.16196e-05	0.922395	0.954571	0.952692
PE(22:2/18:0)	0.000646652	0.000653501	0.0811995	0.98952	0.951904
SM(d14:0/24:0)	0.00130923	0.00124755	0.130911	1.04944	0.93747
TG(12:0/12:0/18:0)	4.03809e-07	4.08737e-07	0.141505	0.987943	0.937112
DG(18:2/18:2)	8.29586e-05	8.65938e-05	0.138368	0.95802	0.934438
TG(16:0/16:1/20:5)	5.06092e-07	5.2896e-07	0.899679	0.956768	0.925505
PC(P-16:0/2:0)	6.91919e-05	6.46425e-05	1.04528	1.07038	0.924338
PE(18:0/16:0)	0.00125844	0.0012182	0.316117	1.03303	0.923818
DG(18:2/18:1)	0.000172859	0.000183543	0.232302	0.941794	0.9162
SM(d15:1/20:0)	0.000622005	0.000663324	0.414212	0.937709	0.911942
TG(16:0/16:0/18:1)	2.58028e-05	2.37626e-05	0.0245546	1.08586	0.907605
SM(d18:1/18:1)	0.00767753	0.00825646	0.526026	0.929882	0.906233
PC(P-16:0/18:2)	4.00099e-05	3.65409e-05	1.0879	1.09494	0.897705
TG(16:0/16:1/18:3)	1.54517e-06	1.69833e-06	0.396999	0.909813	0.896507
TG(16:0/20:0/20:0)	3.00864e-07	2.81815e-07	0.0824963	1.06759	0.88927
TG(14:0/16:0/16:0)	5.66161e-06	5.83155e-06	0.0345009	0.970858	0.888073
SM(d14:0/22:0)	0.00190035	0.00172468	0.138215	1.10185	0.885002
PE(18:2/0:0)	0.00163978	0.00156237	0.0851806	1.04955	0.884787
PC(17:0/18:2)	0.000824736	0.000840674	0.120779	0.981041	0.880095
PA(22:5/21:0)	0.0204547	0.0197583	0.076897	1.03524	0.879154
PE(22:6/18:0)	0.00621102	0.00648123	0.185963	0.958308	0.869
TG(20:1/20:1/22:1)	3.07807e-07	3.41254e-07	0.400008	0.90199	0.866648
SM(d14:1/22:0)	0.00076641	0.000843493	0.53846	0.908614	0.865102
PE(18:1/22:2)	0.00117546	0.00112544	0.0695321	1.04444	0.863221
TG(12:0/12:0/16:0)	1.72198e-06	1.75305e-06	0.219141	0.982276	0.862853
Hex2Cer(d16:1/26:1)	0.000431899	0.00038366	0.756985	1.12573	0.862464
TG(16:0/18:1/18:1)	9.7046e-05	8.47549e-05	0.0425234	1.14502	0.861416
PE(P-20:0/22:5)	0.000160015	0.000146428	0.684923	1.09279	0.859341
PI(18:0/20:3)	0.00829674	0.00901668	0.0418673	0.920155	0.856081
TG(12:0/14:0/16:0)	1.88133e-06	1.94693e-06	0.183195	0.966307	0.855666
TG(17:0/18:2/18:2)	9.64706e-07	8.80449e-07	0.189344	1.0957	0.850614
PA(18:2/14:0)	0.00165213	0.00154173	0.304469	1.07161	0.848081
SM(d15:0/24:1)	0.000754452	0.000687347	0.0359682	1.09763	0.846845
SM(d15:1/24:1)	8.12562e-05	7.34795e-05	0.0795617	1.10584	0.831393
TG(20:2/20:2/22:0)	3.20557e-07	2.7925e-07	0.035989	1.14792	0.825828
TG(18:1/18:2/20:2)	4.37855e-06	3.80516e-06	0.106952	1.15069	0.825112
TG(16:0/16:1/16:1)	1.21264e-05	1.13144e-05	0.225699	1.07177	0.824984
TG(18:0/18:1/18:1)	1.16447e-05	1.00123e-05	0.0609415	1.16304	0.822719
TG(16:0/16:0/22:1)	2.08699e-06	1.89192e-06	0.219316	1.10311	0.813834
PE(18:1/22:4)	0.00352969	0.00383708	0.506165	0.919889	0.809295
TG(16:0/18:0/18:1)	1.59644e-05	1.32962e-05	0.0632203	1.20067	0.809241
TG(16:0/18:0/18:0)	2.73686e-06	2.34143e-06	0.119401	1.16888	0.808848
SM(d14:0/26:0)	0.002217	0.00249993	0.49898	0.886827	0.80763
TG(17:0/18:1/18:1)	1.55977e-06	1.39267e-06	0.296804	1.11998	0.804903
TG(16:0/16:0/18:2)	3.37029e-05	2.91759e-05	0.253253	1.15516	0.80407
TG(16:0/16:0/18:0)	6.287e-06	5.67402e-06	0.463332	1.10803	0.802672
PE(20:1/24:1)	0.00047373	0.000501376	0.275964	0.944859	0.801171
PC(20:2/18:2)	0.00109309	0.00111281	0.352506	0.982282	0.799308
HexCer(d16:0/24:4)	0.000433763	0.000503016	0.549192	0.862325	0.798397
PC(22:6/16:0)	0.00101657	0.000970277	0.233274	1.04771	0.793531
SM(d14:1/24:1)	0.00169148	0.00202548	0.602971	0.835101	0.791616
TG(18:0/18:0/18:0)	1.1234e-06	1.1872e-06	0.36158	0.94626	0.789631
TG(16:0/16:0/16:0)	6.7422e-06	6.16708e-06	0.527727	1.09326	0.789196
PG(18:1/18:1)	0.000769096	0.00087046	0.00206565	0.88355	0.788438
HexCer(d14:1/24:1)	0.000138586	0.00017019	0.58963	0.814303	0.786246
TG(17:1/18:1/18:2)	7.51809e-07	6.88905e-07	0.652238	1.09131	0.785902
TG(18:1/18:1/20:0)	1.93867e-06	1.72533e-06	0.25482	1.12365	0.780667
DG(16:0/10:0)	9.6341e-05	0.000109829	0.601263	0.877188	0.779673
HexCer(d18:1/18:0)	0.000178961	0.000217645	0.698332	0.822261	0.77445
PE(17:0/18:2)	0.000575601	0.000558203	0.356767	1.03117	0.770503
TG(18:0/19:0/22:1)	4.18701e-07	3.65934e-07	0.226848	1.1442	0.769565
SM(d14:0/26:1)	0.000570867	0.000659954	0.534177	0.865011	0.767519
DG(14:0/14:0)	8.48484e-05	9.72744e-05	0.63801	0.872259	0.767141
TG(16:0/18:1/20:1)	5.36804e-07	4.91384e-07	0.315411	1.09243	0.764791
PC(17:0/0:0)	4.25425e-06	3.53e-06	1.02326	1.20517	0.7565
TG(16:1/20:1/22:0)	1.46548e-06	1.28036e-06	0.30977	1.14458	0.755122
PS(18:0/22:4)	0.025273	0.0239293	0.483658	1.05615	0.753692
PC(18:2/14:0)	0.000731703	0.000880754	0.558882	0.830769	0.747816
TG(18:0/18:1/20:0)	5.15865e-07	4.52473e-07	0.290226	1.1401	0.747696
DG(16:0/16:0)	0.000179672	0.000202606	0.459516	0.886808	0.743638
TG(14:0/16:0/16:1)	8.74615e-06	1.0048e-05	0.39999	0.870436	0.73865
PE(18:2/22:4)	0.0016013	0.0017669	0.276062	0.906275	0.735107
Sphingosine(16:0)	0.866554	0.849808	0.425191	1.01971	0.73419
PG(18:2/18:1)	0.000897182	0.000776171	0.622446	1.15591	0.725521
PE(21:0/20:1)	0.000239741	0.000223605	0.48681	1.07216	0.724217
TG(16:0/17:2/18:2)	3.61295e-07	4.18205e-07	1.03718	0.863918	0.722054
PE(18:1/16:0)	0.000946894	0.000898815	0.307466	1.05349	0.721986
TG(16:0/17:1/20:4)	9.97351e-07	8.48653e-07	0.355657	1.17522	0.720477
PE(16:0/18:2)	0.0083339	0.00801904	0.290159	1.03926	0.71712
PE(18:1/18:2)	0.0227069	0.0239068	0.499412	0.94981	0.715945
SM(d14:1/16:0)	0.000152441	0.000142254	0.503375	1.07162	0.711405
TG(16:0/16:0/22:0)	5.24772e-07	4.57206e-07	0.406447	1.14778	0.707963
PA(18:0/14:0)	0.00276205	0.00259016	0.227092	1.06636	0.705941
PC(18:3/16:0)	0.000950501	0.00105951	0.274415	0.897114	0.69757
PE(P-16:0/20:4)	0.000435201	0.000405274	0.21378	1.07384	0.691982
TG(16:0/18:2/22:1)	3.46112e-06	2.78434e-06	0.34946	1.24306	0.691351
SM(d18:0/24:4)	0.000460469	0.000535574	0.690113	0.859766	0.690309
TG(18:0/20:2/22:0)	4.1772e-07	3.56546e-07	0.410727	1.17158	0.688872
PI(18:0/20:4)	0.0383567	0.0345361	0.457444	1.11062	0.688376
PE(22:1/0:0)	0.000219029	0.000158859	0.321996	1.37876	0.684951
SM(d18:1/26:1)	0.000355202	0.000412707	0.664073	0.860664	0.683809
TG(16:0/18:1/22:1)	8.69832e-07	7.18213e-07	0.380298	1.21111	0.683803
PC(P-20:0/16:0)	2.7082e-05	4.50717e-05	0.854847	0.600865	0.682331
PE(P-18:0/20:4)	0.014231	0.0186462	0.760613	0.763211	0.677961
DG(18:1/18:1)	0.000228299	0.000276278	0.648631	0.82634	0.676492
PE(20:1/18:1)	0.000363694	0.000393494	0.539881	0.924268	0.675202
PE(18:0/20:4)	0.00220699	0.00195418	0.571254	1.12936	0.673788
PA(20:4/26:0)	0.0150555	0.0141331	0.443728	1.06526	0.673712
SM(d14:0/24:1)	0.000238172	0.000319739	0.785046	0.744895	0.670635
SM(d14:1/26:1)	0.00369804	0.00461786	0.70625	0.800813	0.667387
SM(d15:0/26:1)	0.00216221	0.00254363	0.633839	0.85005	0.666949
TG(18:1/18:1/22:1)	1.317e-06	1.07687e-06	0.423466	1.22299	0.66684
CerP(d18:1/24:4)	0.00018594	0.000232244	0.576012	0.800625	0.663686
PE(P-18:0/18:1)	0.00130421	0.00144156	0.78265	0.904725	0.663516
PC(26:0/9:0)	0.000560183	0.000596473	0.420241	0.939159	0.66296
PC(P-20:0/19:0)	0.00198421	0.00235976	0.693618	0.840852	0.662693
TG(16:0/16:0/17:0)	1.2682e-06	1.17863e-06	0.611398	1.07599	0.65716
SM(d16:0/26:1)	0.0149573	0.0178715	0.704559	0.836934	0.652732
TG(18:1/18:1/18:2)	4.46997e-05	3.16462e-05	0.345661	1.41248	0.645355
PC(14:0/0:0)	2.10617e-06	1.60574e-06	1.01596	1.31164	0.645103
TG(18:1/18:1/20:4)	6.69649e-06	5.05465e-06	0.508883	1.32482	0.643866
PC(P-20:0/10:0)	5.77523e-06	4.51664e-06	1.15039	1.27866	0.643742
TG(16:0/17:0/18:2)	2.69174e-06	2.30007e-06	0.588903	1.17029	0.63322
HexCer(d14:1/26:1)	0.000168779	0.000224832	0.753511	0.750692	0.628813
TG(18:0/18:0/22:1)	9.49717e-07	7.73187e-07	0.465058	1.22832	0.628562
HexCer(d18:1/20:0)	0.00023059	0.000317005	0.844417	0.727401	0.623381
Hex2Cer(d14:1/20:0)	0.00513149	0.0102299	0.665469	0.501615	0.621448
TG(18:1/18:1/20:2)	4.66119e-06	3.31022e-06	0.45834	1.40812	0.621405
PE(18:0/20:2)	0.00517421	0.00575815	0.637418	0.898589	0.619357
SM(d18:0/26:1)	9.88303e-05	0.000110718	0.609832	0.892633	0.617988
TG(18:1/18:2/18:2)	2.20925e-05	1.67008e-05	0.446818	1.32284	0.615429
PS(18:0/18:2)	0.00564774	0.00401226	0.615906	1.40762	0.613865
TG(20:0/20:2/20:2)	6.42067e-07	4.93903e-07	0.520659	1.29998	0.611616
PC(P-20:0/20:4)	0.000182684	0.000208211	0.678907	0.877398	0.60942
PC(22:6/18:0)	0.000742738	0.000821515	0.544156	0.904108	0.607711
TG(17:0/17:0/17:1)	1.96208e-06	1.68746e-06	0.699557	1.16274	0.605394
TG(20:1/20:1/20:1)	1.13923e-06	9.25554e-07	0.547458	1.23087	0.604974
TG(18:1/18:1/22:2)	1.23043e-06	9.48913e-07	0.533051	1.29667	0.603556
TG(18:0/18:1/22:0)	8.45554e-07	7.13586e-07	0.633167	1.18494	0.602568
PE(P-18:0/22:5)	0.00173988	0.00202824	0.693971	0.857828	0.600802
PC(P-16:0/18:4)	3.98053e-05	6.17964e-05	0.980768	0.644137	0.598868
HexCer(d18:0/24:4)	0.000602145	0.000780982	0.823292	0.77101	0.596977
TG(16:1/16:1/19:0)	4.84937e-07	4.09142e-07	0.585082	1.18525	0.593086
PI(18:0/18:1)	0.00640292	0.00511841	0.555617	1.25096	0.58557
HexCer(d18:1/22:0)	0.000365429	0.000473897	0.830748	0.771115	0.581685
PC(P-18:0/22:6)	1.14974e-05	1.58402e-05	0.820361	0.725838	0.580262
TG(16:0/16:1/18:2)	1.37445e-05	1.07469e-05	0.590538	1.27893	0.579245
TG(17:0/18:1/18:2)	1.62443e-06	1.27612e-06	0.628473	1.27294	0.578552
PC(P-20:0/22:2)	1.47508e-05	2.6156e-05	0.799039	0.563954	0.571335
PE(18:2/22:6)	0.000329888	0.000439773	0.824994	0.750133	0.570223
PE(22:6/16:0)	0.00108431	0.000958809	0.271439	1.1309	0.569008
SM(d14:0/18:1)	0.00151283	0.00111834	1.13246	1.35274	0.567181
PC(18:2/18:2)	0.00334654	0.00319291	0.747067	1.04811	0.566665
SM(d17:0/26:1)	0.000247438	0.000290235	0.76778	0.852543	0.561755
PE(24:4/18:1)	0.000234605	0.00018982	0.684594	1.23594	0.553665
TG(16:0/17:0/18:1)	6.376e-07	5.38336e-07	0.756809	1.18439	0.54824
PC(P-20:0/18:4)	6.04936e-05	7.27155e-05	0.756438	0.831922	0.542109
TG(18:1/18:2/22:2)	1.88175e-06	1.32162e-06	0.636006	1.42383	0.541514
TG(16:0/18:2/18:2)	3.09711e-05	2.10592e-05	0.631765	1.47067	0.541472
TG(16:0/18:1/18:2)	5.37941e-06	3.77147e-06	0.637371	1.42634	0.539002
PI(16:0/20:4)	0.00161359	0.00141786	0.638051	1.13805	0.538984
SM(d14:1/14:0)	3.5388e-05	2.74025e-05	0.828808	1.29141	0.535381
SM(d15:0/22:0)	0.000108666	0.000182509	0.936838	0.595399	0.53449
TG(12:0/14:0/16:1)	1.53489e-06	1.75756e-06	0.577833	0.873307	0.529622
PE(16:0/0:0)	0.00116824	0.00141316	0.724053	0.826686	0.529166
PE(16:0/16:1)	0.000732994	0.000618678	0.697061	1.18477	0.528582
SM(d19:1/24:4)	5.68003e-05	7.29564e-05	0.833028	0.778551	0.526784
PC(18:0/22:4)	0.000510131	0.000590788	0.837127	0.863475	0.523436
PE(20:1/0:0)	0.000333225	0.000374989	0.915428	0.888627	0.522889
SM(d17:0/26:0)	3.83404e-05	4.60029e-05	0.824994	0.833434	0.522506
PE(18:0/20:1)	0.00276255	0.00325915	0.641556	0.84763	0.522026
PG(18:4/18:1)	0.00258802	0.0013119	0.356573	1.97272	0.518175
SM(d16:1/26:1)	0.0377095	0.0525992	0.899565	0.71692	0.516037
Cer(t14:0/24:0)	0.000273555	0.000371194	0.752147	0.736961	0.515137
TG(18:1/18:1/18:1)	1.74659e-07	2.13563e-07	1.12868	0.817833	0.515128
Cer(t14:0/20:0)	0.000347419	0.00017715	1.1794	1.96115	0.514332
TG(18:1/20:1/22:4)	9.0498e-07	7.97156e-07	1.08307	1.13526	0.510921
PE(20:1/22:1)	0.00166553	0.00188167	0.60049	0.885132	0.506598
SM(d14:0/18:0)	0.000134859	9.56987e-05	1.13715	1.4092	0.506249
HexCer(d18:1/24:0)	0.000686265	0.000891713	0.936662	0.769603	0.50502
Cer(d18:0/18:0)	5.44544e-05	6.4644e-05	0.350799	0.842373	0.496633
TG(18:2/18:2/18:2)	2.86842e-06	4.20268e-06	1.25472	0.682521	0.49645
PE(20:1/18:0)	0.00130254	0.00120869	0.751431	1.07764	0.496356
SM(d18:1/24:4)	0.000301018	0.000433474	0.902178	0.69443	0.495693
SM(d15:1/26:1)	0.0004795	0.000288938	1.16809	1.65952	0.493708
PE(P-18:0/22:2)	0.00044051	0.000317836	0.845585	1.38597	0.493121
TG(18:2/18:2/18:3)	1.18537e-06	9.01584e-07	0.838423	1.31477	0.491977
PE(P-18:0/22:6)	0.000242907	0.000259447	0.781336	0.936249	0.48822
PE(P-18:0/20:1)	0.000908192	0.000643769	0.873582	1.41074	0.485957
PA(18:0/20:3)	0.00602711	0.00509427	0.549471	1.18312	0.483833
HexCer(d18:1/24:1)	0.000189096	0.000174124	0.774899	1.08599	0.483203
TG(17:0/17:0/17:0)	6.64498e-07	5.82763e-07	0.977345	1.14025	0.481316
PE(18:0/0:0)	0.00471171	0.00296579	0.988598	1.58869	0.475188
PC(P-20:0/18:3)	3.92297e-05	7.59103e-05	0.979342	0.516791	0.470295
TG(18:0/20:1/22:1)	9.12659e-07	6.99762e-07	0.797233	1.30424	0.470274
PE(17:0/18:1)	0.000487536	0.000540727	0.664364	0.901631	0.469792
PE(20:1/20:1)	0.000932729	0.000625292	0.898008	1.49167	0.465223
SM(d17:1/24:4)	3.71544e-05	5.62729e-05	1.0496	0.660254	0.459174
TG(18:2/18:2/22:6)	2.85136e-07	3.84685e-07	1.25795	0.741218	0.454192
PE(P-16:0/22:2)	0.00133626	0.000913681	0.880727	1.4625	0.450078
PE(18:1/0:0)	0.00217732	0.00146313	0.894163	1.48812	0.449216
SM(d15:0/18:0)	2.32285e-05	1.32466e-05	1.18419	1.75355	0.442147
PE(16:0/16:0)	0.000655822	0.00045191	0.909349	1.45122	0.439413
SM(d15:0/18:1)	0.000441388	0.000240164	1.19398	1.83786	0.430962
PE(18:2/20:4)	0.000730617	0.000664767	0.893474	1.09906	0.428436
TG(12:0/16:1/16:1)	1.87093e-06	1.52678e-06	1.19268	1.2254	0.426785
PE(18:0/20:3)	0.00546348	0.00297548	0.873158	1.83617	0.425128
PE(P-18:0/18:2)	0.00967248	0.00636798	0.897567	1.51892	0.423561
PC(P-20:0/15:0)	7.27501e-06	4.30195e-06	1.26113	1.69109	0.420952
PG(14:1/18:0)	0.000303627	0.000234893	0.612528	1.29262	0.417407
PE(P-18:0/20:3)	0.0010031	0.00128492	0.972967	0.780673	0.41053
PE(P-16:0/22:6)	0.00508633	0.00609226	0.975502	0.834883	0.410254
TG(18:1/18:2/22:6)	1.27811e-06	8.95913e-07	1.03182	1.4266	0.408527
PE(P-18:0/0:0)	0.00169079	0.00342894	0.909912	0.493094	0.406629
SM(d14:0/20:0)	0.00164643	0.00291353	1.07074	0.565098	0.404144
PC(P-20:0/18:1)	0.000184086	0.000287449	1.0119	0.640411	0.402125
PI(18:1/18:2)	0.000516144	0.00100119	1.40273	0.515529	0.401269
PC(16:0/18:1)	0.000234054	0.000349227	0.812984	0.670206	0.401163
PE(P-16:0/18:0)	0.000427273	0.000288456	0.913977	1.48124	0.400233
PE(P-16:0/0:0)	0.00411933	0.00803343	0.894721	0.512774	0.398687
TG(18:1/18:1/20:5)	1.00441e-06	1.54987e-06	1.30975	0.648059	0.394696
SM(d17:1/18:1)	2.63086e-05	3.72565e-05	1.07107	0.706148	0.38579
PI(18:1/20:4)	0.00561656	0.00473706	1.03094	1.18566	0.385336
TG(17:1/18:1/20:1)	4.49862e-07	3.25987e-07	1.00636	1.38	0.384156
PE(22:4/0:0)	0.000633062	0.00073477	0.966053	0.861577	0.383429
PE(P-16:0/18:2)	0.0086977	0.00542029	0.91061	1.60466	0.383221
PI(18:0/18:2)	0.0227322	0.0149214	0.833696	1.52346	0.377322
PC(P-20:0/22:5)	1.34314e-05	2.50052e-05	0.760353	0.537143	0.371587
PE(18:2/22:2)	0.00502165	0.00683727	1.01228	0.734452	0.368866
DG(18:0/20:4)	9.10743e-05	0.000156314	1.17327	0.582638	0.367575
TG(16:0/18:1/22:5)	2.05211e-06	1.36709e-06	1.22426	1.50108	0.365899
PC(P-20:0/18:0)	3.79127e-05	6.31967e-05	1.10034	0.599916	0.360869
PE(19:0/20:4)	0.00796087	0.00882707	1.00517	0.90187	0.360577
PA(18:1/14:1)	0.0025778	0.00326346	1.01498	0.7899	0.35793
PE(P-16:0/20:5)	0.000387683	0.000456196	0.866482	0.849817	0.354835
TG(17:1/17:1/17:1)	2.14652e-06	1.71213e-06	0.992752	1.25371	0.354406
PC(18:2/20:4)	0.000482952	0.000582378	0.786513	0.829276	0.351704
PE(18:0/18:2)	0.000586238	0.000686894	1.0164	0.853462	0.350755
PE(P-18:0/22:1)	0.000283033	0.000146097	0.889083	1.9373	0.347549
PA(16:0/12:0)	0.003671	0.00315628	0.865857	1.16308	0.346695
PC(18:0/16:0)	0.000349703	0.000651033	1.02014	0.537151	0.346082
PA(20:4/24:0)	0.114884	0.105228	0.929057	1.09175	0.342685
PC(P-20:0/22:6)	1.07411e-05	1.90201e-05	1.07161	0.564725	0.341848
SM(d19:1/18:1)	1.5083e-05	1.01603e-05	0.983687	1.48451	0.340247
Sphingosine(14:0)	0.00216048	0.00188664	1.03171	1.14515	0.33905
TG(16:1/16:1/16:1)	2.69184e-06	4.16138e-06	1.29455	0.646863	0.338974
Cer(d18:1/20:0)	6.28328e-05	9.13753e-05	1.15912	0.687634	0.338792
PC(P-20:0/11:0)	3.65613e-05	7.41119e-05	1.18495	0.493326	0.338434
TG(12:0/18:1/16:1)	2.74213e-06	4.41548e-06	1.31337	0.621027	0.337982
PC(P-20:0/25:0)	4.31716e-06	6.38258e-06	1.20281	0.676398	0.336093
TG(16:0/17:0/20:1)	8.41476e-07	6.65517e-07	1.10153	1.26439	0.335304
PC(P-20:0/18:2)	5.63689e-05	0.000121139	1.08898	0.465326	0.334781
PE(20:1/16:0)	0.00261782	0.00552015	1.1212	0.474229	0.334761
PS(18:0/18:1)	0.088025	0.0722815	1.01686	1.21781	0.333896
PE(24:4/18:2)	0.000473271	0.000513852	0.871489	0.921027	0.333632
HexCer(d17:0/24:1)	8.77166e-05	0.000119055	1.18742	0.736774	0.333607
Cer(d18:1/18:0)	7.44136e-05	0.000130503	1.21859	0.570206	0.329561
PA(18:2/20:5)	0.00474406	0.00386914	0.911162	1.22613	0.323693
PC(P-20:0/20:5)	2.57587e-05	5.10256e-05	1.09121	0.50482	0.322626
PE(P-18:1/0:0)	0.00138435	0.00244919	1.12263	0.565229	0.318257
PC(P-20:0/22:4)	0.000282165	0.00037696	1.18898	0.748529	0.31576
PC(P-18:0/2:0)	3.29149e-06	6.70593e-06	1.12461	0.490833	0.315683
Hex2Cer(d14:1/22:0)	0.00174054	0.00141664	0.91165	1.22864	0.314979
HexCer(d17:1/16:0)	3.6871e-05	2.43661e-05	1.31754	1.51321	0.314728
PI(18:0/22:4)	0.00260649	0.00179242	0.857602	1.45417	0.313039
Hex2Cer(d16:0/26:1)	0.00517231	0.00306647	0.943872	1.68673	0.312979
PG(18:0/18:1)	0.00147878	0.00189743	1.09859	0.779362	0.311913
TG(14:0/16:1/14:0)	4.0369e-07	3.31982e-07	1.38624	1.216	0.309753
PE(18:1/20:1)	0.00109889	0.00119041	1.1855	0.923114	0.307441
Cer(t16:1/26:0)	0.00203407	0.000844836	0.51673	2.40765	0.304658
PC(P-16:0/15:1)	0.000109503	0.000211798	1.15527	0.517015	0.300632
PC(P-20:0/22:1)	8.32625e-06	3.06365e-05	1.17865	0.271775	0.298344
PE(P-16:0/20:2)	0.000490154	0.000297331	0.971334	1.64851	0.297313
TG(16:0/22:1/22:1)	3.48781e-07	2.05994e-07	1.41024	1.69316	0.297145
PC(P-20:0/14:0)	2.98801e-05	7.01608e-05	1.08505	0.42588	0.296879
PE(21:0/20:4)	0.00500232	0.00450253	1.02834	1.111	0.296322
PC(18:0/20:4)	0.00368906	0.00525418	1.03841	0.702118	0.294551
PC(18:0/0:0)	0.000142995	0.000304225	0.975288	0.47003	0.293242
PC(20:1/18:2)	0.00058136	0.000839435	1.05113	0.692561	0.293134
TG(18:1/18:1/22:4)	8.40003e-07	1.46443e-06	1.39553	0.573603	0.291309
PG(20:1/20:1)	0.00732246	0.00820873	1.0721	0.892033	0.290888
PC(16:0/0:0)	0.000192397	0.000373384	1.15219	0.515278	0.290457
TG(14:1/16:1/16:1)	1.49508e-06	1.11459e-06	1.44005	1.34136	0.289872
PC(18:1/18:2)	0.0127303	0.0147036	1.07842	0.865792	0.284894
PE(18:0/22:1)	0.000480957	0.000257734	1.08023	1.8661	0.282406
SM(d16:1/18:1)	0.000924703	0.00191884	1.19668	0.481909	0.280604
HexCer(d18:0/16:0)	3.3772e-05	8.30583e-05	1.19039	0.406606	0.278172
PE(P-18:0/22:4)	0.00234388	0.00390917	1.13555	0.599585	0.277541
PC(P-20:0/24:4)	1.29598e-05	2.72726e-05	1.23598	0.475197	0.27559
PC(20:1/16:0)	0.00686989	0.00735398	1.20444	0.934173	0.275225
Cer(d18:1/22:0)	0.00011988	0.000174811	1.25616	0.685773	0.272832
PC(P-20:0/20:3)	3.9231e-05	7.17514e-05	1.23313	0.546763	0.269718
PI(20:3/18:1)	0.00218954	0.00116508	1.01451	1.8793	0.2697
PC(22:2/0:0)	0.000126487	0.000140329	1.02994	0.901359	0.269519
TG(12:0/12:0/16:1)	6.853e-07	4.14241e-07	0.881336	1.65435	0.268317
Cer(d18:1/24:0)	4.51293e-05	8.03118e-05	1.22107	0.561927	0.266678
Cer(d17:1/24:0)	3.59547e-05	7.04389e-05	1.31458	0.510438	0.266382
PC(14:0/16:1)	0.000533486	0.000408426	1.12867	1.3062	0.264927
PE(P-16:0/18:3)	0.000227548	0.000129823	0.999032	1.75275	0.259886
PE(22:6/18:1)	0.00488245	0.00378283	1.27821	1.29069	0.258675
PG(21:0/16:0)	0.000357846	0.000214033	1.25172	1.67192	0.257017
PC(P-20:0/14:1)	0.000199891	0.000533765	1.24201	0.374493	0.255843
Cer(d18:1/24:1)	0.000289489	0.00059948	1.26263	0.4829	0.254932
PC(P-18:0/18:3)	7.75255e-05	0.000208538	1.31361	0.371757	0.253809
TG(18:0/18:0/22:0)	3.72159e-07	3.04034e-07	1.35882	1.22407	0.253704
SM(d14:1/20:0)	6.28025e-05	0.000105359	1.32999	0.596082	0.252857
PC(P-20:0/20:2)	0.000104342	0.000229683	1.29525	0.454286	0.25269
PC(24:4/14:0)	0.000210427	0.000272886	1.08294	0.771115	0.25154
PC(P-20:0/16:1)	9.83801e-05	0.00032183	1.30015	0.30569	0.251503
SM(d14:0/16:0)	2.92422e-05	1.69491e-05	0.785798	1.72529	0.250786
SM(d16:1/24:4)	3.23576e-05	1.83754e-05	1.42743	1.76092	0.250318
PE(18:0/18:1)	0.0069521	0.0078107	1.19377	0.890073	0.249636
PE(19:0/18:2)	0.00036803	0.000202317	1.03827	1.81908	0.246421
PG(12:0/18:2)	0.000300334	0.000247404	1.0197	1.21394	0.237357
PE(P-16:0/20:1)	0.00394867	0.0057005	1.2207	0.692689	0.236204
PE(P-18:0/16:0)	0.00130967	0.00176135	1.24069	0.743558	0.235904
PC(14:0/16:0)	0.00100166	0.00129284	1.00528	0.774778	0.23504
Cer(d18:1/16:0)	0.000350608	0.000960728	1.23973	0.36494	0.233393
PC(18:0/18:1)	0.0105581	0.0152513	1.17077	0.692273	0.232559
PE(17:0/22:4)	0.000525404	0.000289632	1.0658	1.81404	0.232466
PE(21:0/18:0)	0.000451969	0.00017715	1.16173	2.55133	0.222444
PC(P-20:0/20:1)	0.000169817	0.000262402	1.46188	0.647164	0.220036
PC(16:0/16:0)	0.000396864	0.00082004	1.08143	0.483957	0.219496
PA(16:0/18:3)	0.00908833	0.0047246	0.99124	1.92362	0.21798
PE(P-16:0/22:4)	0.00685819	0.0115376	1.21168	0.59442	0.217909
SM(d15:1/16:0)	2.32861e-05	1.30388e-05	1.22971	1.78591	0.215447
SM(d15:1/22:0)	8.25512e-05	0.000177814	1.37711	0.464256	0.214438
PE(18:1/20:4)	0.0049392	0.00677586	1.21932	0.728942	0.213396
PA(18:1/20:4)	0.00463821	0.00554954	1.34442	0.835782	0.212194
Hex2Cer(d14:1/26:1)	0.00120868	0.000567226	1.07128	2.13085	0.209867
PE(18:1/18:1)	0.0655105	0.0756579	1.26915	0.865878	0.206558
TG(18:1/18:1/22:6)	1.06065e-05	5.53604e-06	1.35386	1.9159	0.203936
PI(16:0/18:2)	0.00320816	0.00177597	1.17449	1.80643	0.203197
Cer(d18:1/18:1)	3.38899e-05	6.69887e-05	1.29642	0.505904	0.201205
PC(P-20:0/20:0)	3.35362e-05	5.45683e-05	1.45166	0.614573	0.199889
PE(P-20:0/16:0)	0.000674444	0.000994661	1.30908	0.678064	0.199413
CL(18:2/22:0/18:2/18:2)	0.0012089	0.00178375	1.36754	0.677729	0.199013
PC(16:0/20:4)	0.00319645	0.00500968	1.2163	0.638054	0.190894
PI(18:1/16:0)	0.0138203	0.00914468	1.28006	1.51129	0.189168
DG(18:0/20:3)	4.11635e-05	6.26366e-05	1.42957	0.657179	0.188118
PE(P-16:0/18:1)	0.00728111	0.0108753	1.32024	0.669512	0.187117
SM(d15:0/20:0)	4.47351e-05	9.9962e-05	1.49335	0.447521	0.185038
Hex2Cer(d14:0/26:1)	0.00463645	0.00239678	1.00693	1.93445	0.183364
TG(16:1/18:0/22:0)	1.12743e-06	5.621e-07	1.39581	2.00575	0.181837
PC(18:1/16:0)	0.044524	0.0631177	1.31207	0.705413	0.179552
PC(18:1/17:0)	0.000511783	0.000664737	1.3013	0.769903	0.17728
PS(18:0/22:5)	0.0141678	0.0108082	1.30441	1.31083	0.176303
PC(22:4/18:3)	0.00039294	0.000327076	1.2847	1.20137	0.175872
PE(24:4/16:0)	0.00154127	0.00176185	1.38127	0.874805	0.174059
TG(18:1/18:1/22:5)	4.21347e-06	2.37479e-06	1.51661	1.77425	0.173574
PS(18:0/20:3)	0.0250559	0.017852	1.33149	1.40353	0.170438
PC(P-20:0/12:0)	0.000319733	8.20435e-05	1.42398	3.89712	0.168227
PC(18:1/20:4)	0.000995757	0.0014748	1.23408	0.675183	0.164861
PE(16:0/20:4)	0.0017059	0.00246005	1.31755	0.693442	0.1647
PC(16:0/18:2)	0.000323517	0.000179485	1.10455	1.80247	0.163517
PC(P-20:0/24:1)	0.000223151	7.22056e-05	1.52446	3.09049	0.162949
PC(18:0/20:1)	0.00190756	0.00276666	1.21413	0.689482	0.162943
PE(P-16:0/22:5)	0.00557503	0.00813479	1.3198	0.685332	0.157792
TG(16:0/16:0/17:1)	1.84136e-05	1.61685e-05	1.55404	1.13886	0.154798
Sphingosine(12:0)	0.00041337	0.000215406	1.29013	1.91902	0.148795
PE(P-16:0/20:0)	0.000325078	0.00014306	1.34271	2.27233	0.145396
Hex2Cer(d14:0/24:1)	0.00245743	0.00153912	1.3009	1.59665	0.143868
PC(26:0/7:0)	0.00165243	0.00237025	1.34886	0.697156	0.143394
DG(21:0/22:6)	0.000169197	6.81994e-05	1.62108	2.48091	0.142571
PI(18:0/16:1)	0.00225419	0.00370156	1.27099	0.608984	0.138518
PS(18:0/22:6)	0.0464629	0.0327094	1.35058	1.42047	0.129569
PE(20:4/0:0)	0.00153552	0.00202545	1.33554	0.758113	0.126594
PC(18:0/18:2)	0.0551518	0.0625185	1.45895	0.882168	0.122672
PA(18:0/26:1)	0.00272261	0.000741382	1.62335	3.67235	0.117923
Sphingosine(15:1)	0.000835284	0.000446123	1.59795	1.87232	0.115427
PE(20:1/22:0)	0.00338576	0.00369067	1.35947	0.917384	0.110008
Sphingosine(22:0)	0.0074229	0.00648238	1.51753	1.14509	0.109981
PS(18:1/20:1)	0.00812609	0.0122584	1.34478	0.6629	0.0907674
PC(18:2/0:0)	5.17309e-05	6.32521e-05	1.67735	0.817854	0.0896301
DG(18:0/18:0)	0.000130132	0.000104234	1.95581	1.24847	0.0848104
TG(18:0/18:0/20:0)	6.98004e-07	3.43007e-07	1.48599	2.03495	0.0825311
Hex2Cer(d14:0/20:0)	0.000482837	0.00127804	1.84446	0.377797	0.0805824
PE(18:0/18:0)	0.0026804	0.0034696	1.56058	0.772539	0.0743382
PA(16:0/14:1)	0.00189429	0.0015721	1.47646	1.20495	0.0719351
TG(16:0/18:2/18:3)	5.16199e-06	3.26616e-06	1.90216	1.58045	0.0705655
PE(18:2/18:2)	0.00282167	0.00233312	1.59201	1.2094	0.0663207
TG(16:1/16:1/17:1)	1.78551e-06	1.10694e-06	2.09414	1.61301	0.0658591
DG(16:0/22:5)	0.000251778	7.38606e-05	1.93606	3.40882	0.0637036
Hex2Cer(d15:0/26:1)	0.000944696	0.00020496	1.49479	4.60917	0.0586161
PC(18:0/22:5)	0.000261438	0.000641443	1.62512	0.407578	0.0523481
PE(24:4/18:0)	0.000468704	0.000599816	1.74915	0.781413	0.0363017
PC(P-16:0/18:3)	2.17789e-05	1.65868e-05	1.79448	1.31303	0.0343063
TG(18:2/18:2/22:4)	2.09156e-06	1.48122e-06	2.10307	1.41205	0.029372
PC(P-18:0/20:5)	0.000139764	0.000110683	1.92194	1.26274	0.0288666
PE(P-16:0/20:3)	0.00258454	0.003744	1.74515	0.690314	0.0224438
PC(18:0/20:2)	0.00140899	0.00179896	1.86149	0.783228	0.0124105
PC(P-16:0/20:5)	0.000493105	0.000353922	2.13205	1.39326	0.0110654
SM(d15:1/24:4)	0.0197408	0.013961	2.16479	1.414	0.00837187
PC(P-18:0/18:4)	0.00143724	0.00103162	2.13059	1.39319	0.00828017
PC(18:0/20:3)	0.0013861	0.00209373	1.91601	0.662024	0.00263635
Preterm, mean value of preterm group; Term, mean value of term group; VIP, variable importance in projection
